# Supplementary material
Source: ML conference proceedings conference paper supplement (https://openaccess.thecvf.com/content/cvpr_2017/html/Ke_An_Efficient_Algebraic_2017_CVPR_paper.html)
Supplement: Supplementary file 1 [file Ke_An_Efficient_Algebraic_2017_CVPR_supplemental.zip]

#### 5.4. Derivation of $\bar{f}_{ij}$

$$\begin{aligned}
\bar{f}_{i1} &\triangleq \mathbf{u}_i^T [\mathbf{k}_1]^2 [\mathbf{k}_3'']^2 \mathbf{v}_i'' \\
&= \mathbf{u}_i^T [\mathbf{k}_1] (\mathbf{k}_3'' \mathbf{k}_1^T - (\mathbf{k}_1^T \mathbf{k}_3'') \mathbf{I}) [\mathbf{k}_3''] \mathbf{v}_i'' \\
&= (\mathbf{u}_i^T [\mathbf{k}_1] \mathbf{k}_3'') (\mathbf{k}_1^T [\mathbf{k}_3''] \mathbf{v}_i'') \\
&= ((\mathbf{u}_i \times \mathbf{k}_1)^T \mathbf{k}_3'') (\mathbf{k}_1^T \mathbf{C}(\mathbf{k}_1, \phi) \mathbf{C}(\mathbf{k}_2, \theta_2) [\mathbf{k}_3] \mathbf{v}_i) \\
&= \delta \mathbf{k}_1'^T [\mathbf{k}_3] \mathbf{v}_i \\
&= \delta \mathbf{v}_i^T \mathbf{k}_2 \\
\bar{f}_{i2} &\triangleq \mathbf{u}_i^T [\mathbf{k}_1]^2 [\mathbf{k}_3''] \mathbf{v}_i'' \\
&= (\mathbf{u}_i^T [\mathbf{k}_1] \mathbf{k}_3'') (\mathbf{k}_1^T \mathbf{v}_i'') \\
&= \delta (\mathbf{k}_1^T \mathbf{C}(\mathbf{k}_1, \phi) \mathbf{C}(\mathbf{k}_2, \theta_2) \mathbf{v}_i) \\
&= \delta \mathbf{v}_i^T \mathbf{k}_1' \\
\bar{f}_{i3} &\triangleq (\mathbf{k}_3''^T \mathbf{v}_i'') \mathbf{u}_i^T [\mathbf{k}_1] \mathbf{k}_3'' \\
&= \delta \mathbf{k}_3^T \mathbf{C}(\mathbf{k}_2, -\theta_2) \mathbf{C}(\mathbf{k}_1, -\phi) \mathbf{C}(\mathbf{k}_1, \phi) \mathbf{C}(\mathbf{k}_2, \theta_2) \mathbf{v}_i \\
&= \delta \mathbf{v}_i^T \mathbf{k}_3 \\
\bar{f}_{i4} &\triangleq -(\mathbf{u}_i^T \mathbf{k}_1) \mathbf{k}_1^T [\mathbf{k}_3'']^2 \mathbf{v}_i'' \\
&= -(\mathbf{u}_i^T \mathbf{k}_1) \mathbf{k}_1 (\mathbf{k}_3'' \mathbf{k}_3''^T - \mathbf{I}) \mathbf{v}_i'' \\
&= (\mathbf{u}_i^T \mathbf{k}_1) (\mathbf{k}_1 \mathbf{v}_i'') \\
&= (\mathbf{u}_i^T \mathbf{k}_1) (\mathbf{v}_i^T \mathbf{k}_1') \\
\bar{f}_{i5} &\triangleq -(\mathbf{u}_i^T \mathbf{k}_1) \mathbf{k}_1^T [\mathbf{k}_3''] \mathbf{v}_i'' = -(\mathbf{u}_i^T \mathbf{k}_1) (\mathbf{v}_i^T \mathbf{k}_2)
\end{aligned}$$

#### 5.5. Derivation of $f_{ij}$ and $\bar{\mathbf{C}}$

First, note that

$$\begin{aligned}
\mathbf{v}_i^T \mathbf{k}_2 &= ({}^c \mathbf{b}_i \times {}^c \mathbf{b}_3)^T (\mathbf{k}_1' \times \mathbf{k}_3) \\
&= ({}^c \mathbf{b}_i^T \mathbf{k}_1') ({}^c \mathbf{b}_3^T \mathbf{k}_3) - ({}^c \mathbf{b}_i^T \mathbf{k}_3) ({}^c \mathbf{b}_3^T \mathbf{k}_1') \\
&= ({}^c \mathbf{b}_i^T \mathbf{k}_1') ({}^c \mathbf{b}_3^T \mathbf{k}_3) \\
\mathbf{v}_i^T \mathbf{k}_1' &= -({}^c \mathbf{b}_i \times {}^c \mathbf{b}_3)^T (\mathbf{k}_2 \times \mathbf{k}_3) \\
&= -({}^c \mathbf{b}_i^T \mathbf{k}_2) ({}^c \mathbf{b}_3^T \mathbf{k}_3) + ({}^c \mathbf{b}_i^T \mathbf{k}_3) ({}^c \mathbf{b}_3^T \mathbf{k}_2) \\
&= -({}^c \mathbf{b}_i^T \mathbf{k}_2) ({}^c \mathbf{b}_3^T \mathbf{k}_3)
\end{aligned}$$

Let  $\psi \triangleq \theta_3 - \theta_3'$ , and thus

$$\begin{bmatrix} \cos \theta_3' \\ \sin \theta_3' \end{bmatrix} = \begin{bmatrix} \cos \psi \cos \theta_3 + \sin \psi \sin \theta_3 \\ \cos \psi \sin \theta_3 - \sin \psi \cos \theta_3 \end{bmatrix} \quad (64)$$

From (64) and (27), we get

$$\begin{aligned}
\cos \psi &= \frac{\bar{f}_{11}}{\sqrt{\bar{f}_{11}^2 + \bar{f}_{12}^2}} = -\frac{\bar{f}_{15}}{\sqrt{\bar{f}_{14}^2 + \bar{f}_{15}^2}} \\
&= \frac{\mathbf{v}_1^T \mathbf{k}_2}{\sqrt{(\mathbf{v}_1^T \mathbf{k}_2)^2 + (\mathbf{v}_1^T \mathbf{k}_1')^2}} \\
&= \frac{{}^c \mathbf{b}_1^T \mathbf{k}_1'}{\sqrt{({}^c \mathbf{b}_1^T \mathbf{k}_2)^2 + ({}^c \mathbf{b}_1^T \mathbf{k}_1')^2}} \\
&= \frac{{}^c \mathbf{b}_1^T \mathbf{k}_1'}{\|\mathbf{k}_3 \times {}^c \mathbf{b}_1\|} \\
&= {}^c \mathbf{b}_1^T \mathbf{k}_1'
\end{aligned}$$

$$\begin{aligned}
\sin \psi &= \frac{\bar{f}_{12}}{\sqrt{\bar{f}_{11}^2 + \bar{f}_{12}^2}} = \frac{\bar{f}_{14}}{\sqrt{\bar{f}_{14}^2 + \bar{f}_{15}^2}} \\
&= \frac{\mathbf{v}_1^T \mathbf{k}_1'}{\sqrt{(\mathbf{v}_1^T \mathbf{k}_2)^2 + (\mathbf{v}_1^T \mathbf{k}_1')^2}} \\
&= -{}^c \mathbf{b}_1^T \mathbf{k}_2
\end{aligned}$$

Then, from (26) and (28), we derive the expressions of  $f_{ij}$ :

$$\begin{aligned}
f_{11} &= \bar{f}_{11} \cos \psi + \bar{f}_{12} \sin \psi \\
&= \delta ({}^c \mathbf{b}_3^T \mathbf{k}_3) (({}^c \mathbf{b}_1^T \mathbf{k}_2)^2 + ({}^c \mathbf{b}_1^T \mathbf{k}_1')^2) \\
&= \delta ({}^c \mathbf{b}_3^T \mathbf{k}_3) \\
f_{21} &= \bar{f}_{21} \cos \psi + \bar{f}_{22} \sin \psi \\
&= \delta ({}^c \mathbf{b}_3^T \mathbf{k}_3) (({}^c \mathbf{b}_2^T \mathbf{k}_2) ({}^c \mathbf{b}_1^T \mathbf{k}_2) + ({}^c \mathbf{b}_2^T \mathbf{k}_1') ({}^c \mathbf{b}_1^T \mathbf{k}_1')) \\
&= \delta ({}^c \mathbf{b}_3^T \mathbf{k}_3) ({}^c \mathbf{b}_2^T (\mathbf{k}_2 \mathbf{k}_2^T + \mathbf{k}_1' \mathbf{k}_1'^T) {}^c \mathbf{b}_1) \\
&= \delta ({}^c \mathbf{b}_3^T \mathbf{k}_3) ({}^c \mathbf{b}_2^T (\mathbf{I} - \mathbf{k}_3 \mathbf{k}_3^T) {}^c \mathbf{b}_1) \\
&= \delta ({}^c \mathbf{b}_3^T \mathbf{k}_3) ({}^c \mathbf{b}_2^T {}^c \mathbf{b}_1) \\
f_{22} &= -\bar{f}_{21} \sin \psi + \bar{f}_{22} \cos \psi \\
&= \delta ({}^c \mathbf{b}_3^T \mathbf{k}_3) (({}^c \mathbf{b}_2^T \mathbf{k}_1') ({}^c \mathbf{b}_1^T \mathbf{k}_2) - ({}^c \mathbf{b}_2^T \mathbf{k}_2) ({}^c \mathbf{b}_1^T \mathbf{k}_1')) \\
&= \delta ({}^c \mathbf{b}_3^T \mathbf{k}_3) ({}^c \mathbf{b}_2^T (\mathbf{k}_2 \mathbf{k}_2^T + \mathbf{k}_1' \mathbf{k}_1'^T) {}^c \mathbf{b}_1) \\
&= \delta ({}^c \mathbf{b}_3^T \mathbf{k}_3) ({}^c \mathbf{b}_2 \times {}^c \mathbf{b}_1)^T (\mathbf{k}_1' \times \mathbf{k}_2) \\
&= \delta ({}^c \mathbf{b}_3^T \mathbf{k}_3) \|{}^c \mathbf{b}_2 \times {}^c \mathbf{b}_1\| {}^c \mathbf{k}_3^T \mathbf{k}_3 \\
&= \delta ({}^c \mathbf{b}_3^T \mathbf{k}_3) \|{}^c \mathbf{b}_2 \times {}^c \mathbf{b}_1\| \\
f_{15} &= \bar{f}_{15} \cos \psi - \bar{f}_{14} \sin \psi \\
&= -(\mathbf{u}_1^T \mathbf{k}_1) f_{11} / \delta \\
&= -(\mathbf{u}_1^T \mathbf{k}_1) ({}^c \mathbf{b}_3^T \mathbf{k}_3) \\
f_{24} &= \bar{f}_{25} \sin \psi + \bar{f}_{24} \cos \psi \\
&= (\mathbf{u}_2^T \mathbf{k}_1) f_{22} / \delta \\
&= (\mathbf{u}_2^T \mathbf{k}_1) ({}^c \mathbf{b}_3^T \mathbf{k}_3) \|{}^c \mathbf{b}_2 \times {}^c \mathbf{b}_1\| \\
f_{25} &= \bar{f}_{25} \cos \psi - \bar{f}_{24} \sin \psi \\
&= -(\mathbf{u}_2^T \mathbf{k}_1) f_{21} / \delta \\
&= -(\mathbf{u}_2^T \mathbf{k}_1) ({}^c \mathbf{b}_3^T \mathbf{k}_3) ({}^c \mathbf{b}_1^T \mathbf{k}_1')
\end{aligned}$$

Additionally, we can derive the expression of  $\bar{\mathbf{C}}$ , which is defined in (56):

$$\begin{aligned}
\bar{\mathbf{C}} &= \mathbf{C}(\mathbf{e}_2, \theta_3 - \theta_3') \bar{\mathbf{C}}^T \mathbf{C}(\mathbf{k}_1, \phi) \mathbf{C}(\mathbf{k}_2, \theta_2) \\
&= \mathbf{C}(\mathbf{e}_2, \psi) [\mathbf{k}_1 \quad \mathbf{k}_3' \quad \mathbf{k}_2]^T \mathbf{C}(\mathbf{k}_2, \theta_2) \\
&= \mathbf{C}(\mathbf{e}_2, \psi) [\mathbf{k}_1' \quad \mathbf{k}_3 \quad \mathbf{k}_2]^T \\
&= [\cos \psi \mathbf{k}_1' - \sin \psi \mathbf{k}_2 \quad \mathbf{k}_3 \quad \sin \psi \mathbf{k}_1' + \cos \psi \mathbf{k}_2]^T \\
&= [(\mathbf{k}_1' \mathbf{k}_1'^T + \mathbf{k}_2 \mathbf{k}_2^T) {}^c \mathbf{b}_1 \quad \mathbf{k}_3 \quad \sin \psi \mathbf{k}_1' + \cos \psi \mathbf{k}_2]^T \\
&= [(\mathbf{I} - \mathbf{k}_3 \mathbf{k}_3^T) {}^c \mathbf{b}_1 \quad \mathbf{k}_3 \quad \sin \psi \mathbf{k}_1' + \cos \psi \mathbf{k}_2]^T \\
&= [{}^c \mathbf{b}_1 \quad \mathbf{k}_3 \quad \sin \psi \mathbf{k}_1' + \cos \psi \mathbf{k}_2]^T \\
&= [{}^c \mathbf{b}_1 \quad \mathbf{k}_3 \quad {}^c \mathbf{b}_1 \times \mathbf{k}_3]^T
\end{aligned}$$
