# Supplementary material
Source: ML conference proceedings conference paper supplement (https://openaccess.thecvf.com/content/cvpr_2017/html/Ke_An_Efficient_Algebraic_2017_CVPR_paper.html)
Supplement: Supplementary file 1 [file P3P_code.doc]

P3P code

# Instruction

- To run the code, TooN (see https://www.edwardrosten.com/cvd/toon/html-user/) library need to be installed.
- To solve a P3P problem, one need to initialize an object of class “P3p” and call the member function “computePoses” with the input (feature positions and bearing measurements).

----------------------------------------------------------------------------------------------------------------------------

P3p.h

----------------------------------------------------------------------------------------------------------------------------

#ifndef P3P_P3P_H

#define P3P_P3P_H

#include <TooN/TooN.h>

using namespace std;

class P3p {

private:

// Root polishing using Newton's method

// coeffs: The coefficients (from high order to low order)

// roots: Output, polishded roots

inline void polishQuarticRoots(const double *coeffs, double *roots);

public:

P3p() { }

// featureVectors: The 3 bearing measurements (normalized) stored as column vectors

// worldPoints: The positions of the 3 feature points stored as column vectors

// solutions: Output of this function. Column i (i=0,4,8,12) is the solution for the camera position ^G{P}_C, and column i+1 to

// i+3 is the camera orientation (expressed as a 3x3 rotation matrix ^G_C{C})

int computePoses(TooN::Matrix<3, 3> featureVectors, TooN::Matrix<3, 3> worldPoints, TooN::Matrix<3, 16> &solutions);

// Quartic polynomial equation solver.

// factors: The coefficients (from high order to low order)

// realRoots: Output, real parts of the four solutions

int solveQuartic(const double *factors, double *realRoots);

};

#endif //P3P_P3P_H

----------------------------------------------------------------------------------------------------------------------------

P3p.cpp

----------------------------------------------------------------------------------------------------------------------------

#include "P3p.h"

using namespace std;

int P3p::computePoses(TooN::Matrix<3, 3> featureVectors,

TooN::Matrix<3, 3> worldPoints,

TooN::Matrix<3, 16> &solutions) {

// k1

TooN::Vector<3> u0 = worldPoints.T()[0] - worldPoints.T()[1];

double nu0 = TooN::norm(u0);

TooN::Vector<3> k1 = u0 / nu0;

// bi

TooN::Vector<3> b1 = featureVectors.T()[0];

TooN::Vector<3> b2 = featureVectors.T()[1];

TooN::Vector<3> b3 = featureVectors.T()[2];

// k3,tz

TooN::Vector<3> k3 = b1 ^b2;

double nk3 = TooN::norm(k3);

k3 /= nk3;

TooN::Vector<3> tz = b1 ^k3;

// ui,vi

TooN::Vector<3> v1 = b1 ^b3;

TooN::Vector<3> v2 = b2 ^b3;

TooN::Vector<3> u1 = worldPoints.T()[0] - worldPoints.T()[2];

// coefficients related terms

double u1k1 = u1 * k1;

double k3b3 = k3 * b3;

// f1i

double f11 = k3b3;

double f13 = k3 * v1;

double f15 = -u1k1 * f11;

//delta

TooN::Vector<3> nl = u1 ^k1;

double delta = TooN::norm(nl);

nl /= delta;

f11 *= delta;

f13 *= delta;

// f2i

double u2k1 = u1k1 - nu0;

double f21 = tz * v2;

double f22 = nk3 * k3b3;

double f23 = k3 * v2;

double f24 = u2k1 * f22;

double f25 = -u2k1 * f21;

f21 *= delta;

f22 *= delta;

f23 *= delta;

double g1 = f13 * f22;

double g2 = f13 * f25 - f15 * f23;

double g3 = f11 * f23 - f13 * f21;

double g4 = -f13 * f24;

double g5 = f11 * f22;

double g6 = f11 * f25 - f15 * f21;

double g7 = -f15 * f24;

double coeffs[5] = {g5 * g5 + g1 * g1 + g3 * g3,

2 * (g5 * g6 + g1 * g2 + g3 * g4),

g6 * g6 + 2 * g5 * g7 + g2 * g2 + g4 * g4 - g1 * g1 - g3 * g3,

2 * (g6 * g7 - g1 * g2 - g3 * g4),

g7 * g7 - g2 * g2 - g4 * g4};

double s[4];

this->solveQuartic(coeffs, s);

this->polishQuarticRoots(coeffs, s);

TooN::Matrix<3, 3> Ck1nl;

Ck1nl.T()[0] = k1;

Ck1nl.T()[1] = nl;

Ck1nl.T()[2] = k1 ^ nl;

TooN::Matrix<3, 3> Cb1k3tzT;

Cb1k3tzT[0] = b1;

Cb1k3tzT[1] = k3;

Cb1k3tzT[2] = tz;

TooN::Vector<3> b3p = (delta / k3b3) * b3;

for (int i = 0; i < 4; ++i) {

double ctheta1p = s[i];

if (abs(ctheta1p) > 1)

continue;

double stheta1p = sqrt(1 - ctheta1p * ctheta1p);

stheta1p = (k3b3 > 0) ? stheta1p : -stheta1p;

double ctheta3 = g1 * ctheta1p + g2;

double stheta3 = g3 * ctheta1p + g4;

double ntheta3 = stheta1p / ((g5 * ctheta1p + g6) * ctheta1p + g7);

ctheta3 *= ntheta3;

stheta3 *= ntheta3;

TooN::Matrix<3, 3> C13(TooN::Data(ctheta3, 0, -stheta3,

stheta1p * stheta3, ctheta1p, stheta1p * ctheta3,

ctheta1p * stheta3, -stheta1p, ctheta1p * ctheta3));

TooN::Matrix<3, 3> R = Ck1nl * C13 * Cb1k3tzT;

solutions.slice(0, i * 4 + 1, 3, 3) = R;

solutions.T()[i * 4] = worldPoints.T()[2] - stheta1p * (R * b3p);

}

return 0;

}

int P3p::solveQuartic(const double *factors, double *realRoots) {

const double &a4 = factors[0];

const double &a3 = factors[1];

const double &a2 = factors[2];

const double &a1 = factors[3];

const double &a0 = factors[4];

double a4_2 = a4 * a4;

double a3_2 = a3 * a3;

double a4_3 = a4_2 * a4;

double a2a4 = a2 * a4;

double p4 = (8 * a2a4 - 3 * a3_2) / (8 * a4_2);

double q4 = (a3_2 * a3 - 4 * a2a4 * a3 + 8 * a1 * a4_2) / (8 * a4_3);

double r4 = (256 * a0 * a4_3 - 3 * (a3_2 * a3_2) - 64 * a1 * a3 * a4_2 + 16 * a2a4 * a3_2) / (256 * (a4_3 * a4));

double p3 = ((p4 * p4) / 12 + r4) / 3; // /=-3

double q3 = (72 * r4 * p4 - 2 * p4 * p4 * p4 - 27 * q4 * q4) / 432; // /=2

double t; // *=2

complex<double> w;

if (q3 >= 0)

w = -sqrt(static_cast<complex<double>>(q3 * q3 - p3 * p3 * p3)) - q3;

else

w = sqrt(static_cast<complex<double>>(q3 * q3 - p3 * p3 * p3)) - q3;

if (w.imag() == 0.0) {

w.real(cbrt(w.real()));

t = 2.0 * (w.real() + p3 / w.real());

} else {

w = pow(w, 1.0 / 3);

t = 4.0 * w.real();

}

complex<double> sqrt_2m = sqrt(static_cast<complex<double>>(-2 * p4 / 3 + t));

double B_4A = -a3 / (4 * a4);

double complex1 = 4 * p4 / 3 + t;

complex<double> complex2 = 2 * q4 / sqrt_2m;

double sqrt_2m_rh = sqrt_2m.real() / 2;

double sqrt1 = sqrt(-(complex1 + complex2)).real() / 2;

realRoots[0] = B_4A + sqrt_2m_rh + sqrt1;

realRoots[1] = B_4A + sqrt_2m_rh - sqrt1;

double sqrt2 = sqrt(-(complex1 - complex2)).real() / 2;

realRoots[2] = B_4A - sqrt_2m_rh + sqrt2;

realRoots[3] = B_4A - sqrt_2m_rh - sqrt2;

return 0;

}

void P3p::polishQuarticRoots(const double *coeffs, double *roots) {

const int iterations = 2;

for (int i = 0; i < iterations; ++i) {

for (int j = 0; j < 4; ++j) {

double error =

(((coeffs[0] * roots[j] + coeffs[1]) * roots[j] + coeffs[2]) * roots[j] + coeffs[3]) * roots[j] + coeffs[4];

double

derivative = ((4 * coeffs[0] * roots[j] + 3 * coeffs[1]) * roots[j] + 2 * coeffs[2]) * roots[j] + coeffs[3];

roots[j] -= error / derivative;

}

}

}
